# Supplementary material
Source: HighWire-hosted journal article supplement (https://cmaj.ca/highwire/filestream/58321/field_highwire_adjunct_files/3/nursing-hu-4-at.pdf)
Supplement: nursing-hu-4-at.pdf [file nursing-hu-4-at.pdf]

## Appendix 4 (as submitted by the authors)

**Table 1** Rate ratios for selected health outcomes within 180 days after initiating therapy with psychotropic medication: Initially-Treated Analysis

|                                                    | Death |              | Femur Fracture |              | Pneumonia |              | Heart Failure |              |
|----------------------------------------------------|-------|--------------|----------------|--------------|-----------|--------------|---------------|--------------|
|                                                    | IRR   | (95% CI)     | IRR            | (95% CI)     | IRR       | (95% CI)     | IRR           | (95% CI)     |
| <b>Conventional vs. Atypical Antipsychotics</b>    |       |              |                |              |           |              |               |              |
| Unadjusted                                         | 1.20  | (1.02, 1.41) | 1.15           | (0.85, 1.56) | 1.08      | (0.78, 1.50) | 1.14          | (0.70, 1.86) |
| Adjusted                                           |       |              |                |              |           |              |               |              |
| Age, sex and calendar year                         | 1.30  | (1.08, 1.57) | 1.15           | (0.82, 1.63) | 0.92      | (0.63, 1.33) | 1.19          | (0.68, 2.08) |
| PS                                                 | 1.33  | (1.10, 1.61) | 1.16           | (0.82, 1.63) | 0.96      | (0.66, 1.41) | 1.00          | (0.56, 1.79) |
| hdPS                                               | 1.32  | (1.07, 1.64) | 1.12           | (0.77, 1.62) | 0.84      | (0.57, 1.25) | 0.80          | (0.44, 1.47) |
| PS adjusted by patient subgroup                    |       |              |                |              |           |              |               |              |
| No hx either treatment <sup>(1)</sup>              | 1.24  | (1.00, 1.53) | 1.20           | (0.82, 1.75) | 0.95      | (0.63, 1.45) | 1.11          | (0.60, 2.05) |
| Dementia <sup>(2)</sup>                            | 1.33  | (1.04, 1.72) |                |              |           |              |               |              |
| No dementia                                        | 1.32  | (0.99, 1.76) |                |              |           |              |               |              |
| <b>Antidepressants vs. Atypical Antipsychotics</b> |       |              |                |              |           |              |               |              |
| Unadjusted                                         | 1.18  | (1.00, 1.38) | 1.17           | (0.87, 1.57) | 1.15      | (0.85, 1.57) | 2.03          | (1.33, 3.11) |
| Adjusted                                           |       |              |                |              |           |              |               |              |
| Age, sex and year                                  | 1.24  | (1.05, 1.47) | 1.10           | (0.81, 1.50) | 1.13      | (0.82, 1.57) | 1.99          | (1.28, 3.09) |
| PS                                                 | 1.11  | (0.92, 1.33) | 1.24           | (0.87, 1.75) | 0.99      | (0.69, 1.41) | 1.16          | (0.71, 1.89) |
| hdPS                                               | 1.09  | (0.90, 1.33) | 1.23           | (0.85, 1.77) | 0.80      | (0.55, 1.17) | 0.93          | (0.56, 1.57) |
| PS adjusted by patient subgroup                    |       |              |                |              |           |              |               |              |
| No hx either treatment <sup>(1)</sup>              | 1.12  | (0.91, 1.37) | 1.35           | (0.92, 2.00) | 1.07      | (0.71, 1.60) | 1.27          | (0.72, 2.24) |
| Dementia <sup>(2)</sup>                            | 1.15  | (0.87, 1.53) |                |              |           |              |               |              |
| No dementia                                        | 1.08  | (0.84, 1.39) |                |              |           |              |               |              |
| <b>Benzodiazepines vs. Atypical Antipsychotics</b> |       |              |                |              |           |              |               |              |
| Unadjusted                                         | 1.11  | (0.97, 1.28) | 0.85           | (0.65, 1.11) | 1.03      | (0.78, 1.36) | 2.13          | (1.45, 3.12) |
| Adjusted                                           |       |              |                |              |           |              |               |              |
| Age, sex and year                                  | 1.20  | (1.03, 1.39) | 0.77           | (0.58, 1.03) | 0.97      | (0.73, 1.30) | 2.02          | (1.36, 3.01) |
| PS                                                 | 1.05  | (0.89, 1.23) | 0.80           | (0.58, 1.09) | 0.81      | (0.59, 1.12) | 1.45          | (0.94, 2.22) |
| hdPS                                               | 1.00  | (0.84, 1.18) | 0.88           | (0.64, 1.22) | 0.87      | (0.62, 1.21) | 1.42          | (0.90, 2.26) |
| PS adjusted by patient subgroup                    |       |              |                |              |           |              |               |              |
| No hx either treatment <sup>(1)</sup>              | 1.00  | (0.84, 1.20) | 0.85           | (0.59, 1.22) | 0.78      | (0.55, 1.10) | 1.65          | (1.01, 2.70) |
| Dementia <sup>(2)</sup>                            | 0.98  | (0.77, 1.25) |                |              |           |              |               |              |
| No dementia                                        | 1.10  | (0.89, 1.37) |                |              |           |              |               |              |

<sup>(1)</sup> Alternative definition of incident-user: i.e., patients without a history of either the referent (atypical APM) or comparator medication (conventional APM, antidepressant, benzodiazepine, respectively).

<sup>(2)</sup> Due to the small number of events, subgroup analyses could not be run for the non-mortality outcomes.

IRR: incidence rate ratio; PS: propensity score; hdPS: high-dimensional propensity score; Hx: history
